# Supplementary material
Source: PubMed Central journal article supplement (PMC6791589)
Supplement: NIHMS977303-supplement-sup_1_cover_page.pdf [file NIHMS977303-supplement-sup_1_cover_page.pdf]

## SUPPORTING INFORMATION

### S-1 Cover Page

#### Primary article:

# A cost-effective high throughput plasma and serum proteomics workflow enables mapping of the molecular impact of total pancreatectomy with islet autotransplantation

*Tue Bjerg Bennike<sup>1,2,3,4</sup>, Melena D. Bellin<sup>5,6</sup>, Yue Xuan<sup>7</sup>, Allan Stensballe<sup>4</sup>, Frederik Trier Møller<sup>8</sup>, Gregory J. Beilman<sup>5</sup>, Ofer Levy<sup>3,9</sup>, Zobeida Cruz-Monserrate<sup>10</sup>, Vibeke Andersen<sup>11,12,‡</sup>, Judith Steen<sup>13,‡</sup>, Darwin L. Conwell<sup>10,‡</sup>, Hanno Steen<sup>1,2,3,‡</sup>*

<sup>1</sup>Department of Pathology, Harvard Medical School, Boston, MA, USA

<sup>2</sup>Department of Pathology, Boston Children's Hospital, Boston, MA, USA

<sup>3</sup>Precision Vaccines Program, Boston Children's Hospital, Boston, MA, USA

<sup>4</sup>Department of Health Science and Technology, Aalborg University, Aalborg, Denmark

<sup>5</sup>Department of Surgery, University of Minnesota Medical Center, Minneapolis, MN, USA

<sup>6</sup>Department of Pediatrics, University of Minnesota Medical Center, Minneapolis, MN, USA

<sup>7</sup>Thermo Fisher Scientific, Bremen, Germany

<sup>8</sup>Department of Epidemiology Research, Statens Serum Institut, Copenhagen, Denmark

<sup>9</sup>Division of Infectious Diseases, Department of Medicine, Boston Children's Hospital, Boston, MA, USA

<sup>10</sup>The Ohio State University Wexner Medical Center, Columbus, OH, USA

<sup>11</sup>Focused Research Unit for Molecular Diagnostic and Clinical Research (MOK), IRS-Center Sonderjylland, Laboratory Center, Hospital of Southern Jutland, Aabenraa, Denmark

<sup>12</sup>Institute of Molecular Medicine, University of Southern Denmark, Odense, Denmark

<sup>13</sup>F.M. Kirby Neurobiology Center, Boston Children's Hospital, and Department of Neurology, Harvard Medical School, Boston, MA, USA

‡These authors should be considered last authors.

\*To whom correspondence should be addressed: Hanno Steen, Departments of Pathology, Boston Children's Hospital and Harvard Medical School, Boston, MA, USA. Email: [hanno.steen@childrens.harvard.edu](mailto:hanno.steen@childrens.harvard.edu)

**Table of Contents:**

**S-1:** Cover page (.pdf)

**S-2:** Sample information (.xls) Clinical parameters on the 62 participants.

**S-3:** DIA plasma method variable windows (.xls) The m/z windows used in the plasma DIA method.

**S-4:** Plasma proteins cumulated (.xls) Cumulated list of plasma proteins in the 62 participants.

**S-5:** Plasma proteins shared (.xls) List of plasma proteins shared between all 62 participants.

**S-6:** List of identified FDA-approved biomarkers.

**Figure S1:** Absolute concentration of the quantifiable plasma proteins with the workflow reported in g/L (.tif).

**Figure S2:** Volcanoplot of TPIAT changes to the serum proteome with Igs (.tif).
